# Supplementary material
Source: Royal Society of Chemistry journal article supplement (doi:10.1039/d6ta02508k)
Supplement: d6ta02508k1.pdf [file d6ta02508k1.pdf]

## Supporting Information

### Green and Controllable Synthesis of Large-Scale High-Quality Two-Dimensional Boron Nitride by Ambient-Pressure Chemical Vapor Deposition

Yi-Lun Hong\*, Ci Kong, Jihang Xuan, Yi Zheng, Yuebin Lian, Pinyun Ren\*

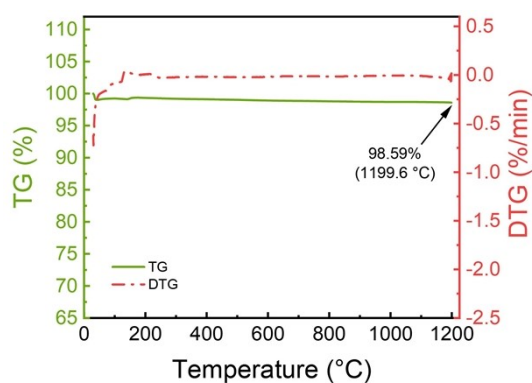

**Figure S1.** Thermo-gravimetric test of the h-BN powder in pure Ar atmosphere with ramp rate of 20 °C/min.

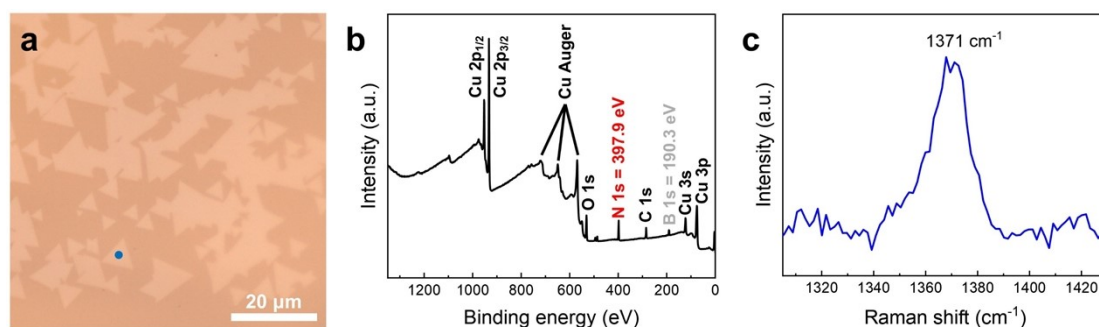

**Figure S2.** a) An optical image of 2D h-BN samples grown on a Cu substrate with cubic BN (c-BN) powders. b) Survey XPS spectra of 2D h-BN samples grown on a Cu substrate in (a). The peaks of B 1s and N 1s are consistent with those of 2D h-BN samples grown with h-BN powders, which are mentioned later. c) Raman spectra of a

2D h-BN domain (blue spot in (a)), which confirming monolayer h-BN.

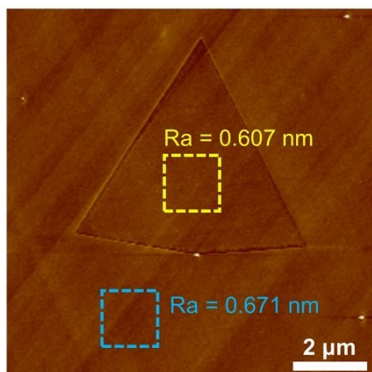

**Figure S3.** An AFM image of a monolayer h-BN sample grown on a Cu substrate before transfer. This monolayer h-BN sample consists of two crystal domains and the grain boundary between them is smooth and seamless. The surface roughness of this monolayer h-BN sample is smoother than that of Cu substrate used in the growth process.

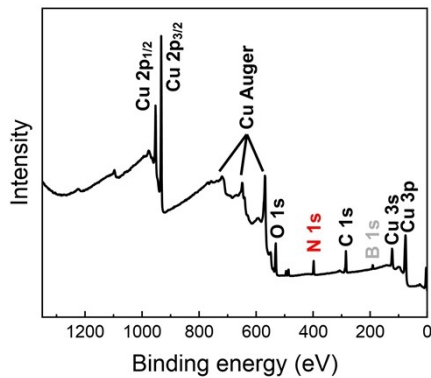

**Figure S4.** Survey XPS spectra of 2D h-BN samples grown on a Cu substrate by using h-BN powders in Figure 1e.

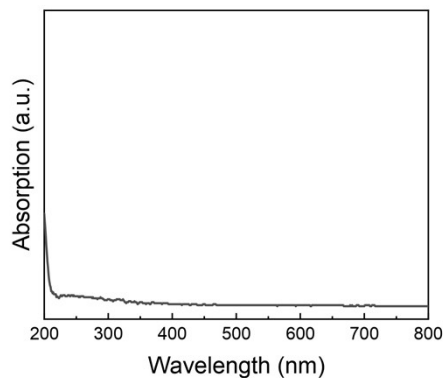

**Figure S5.** The UV-visible absorption spectrum of a monolayer h-BN film transferred onto a quartz substrate. The corresponding OBG analysis is shown in Figure 1f.

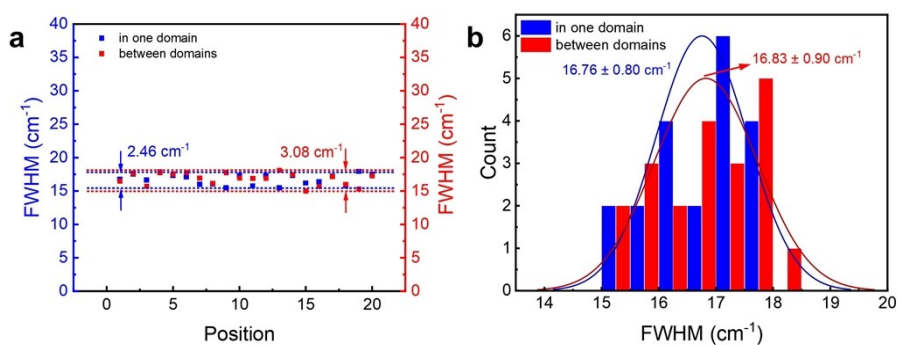

**Figure S6.** a) The offset of FWHM of 20  $E_{2g}$  peaks both in one domain and between domains. b) Histograms of FWHM of 20  $E_{2g}$  peaks both in one domain and between domains.

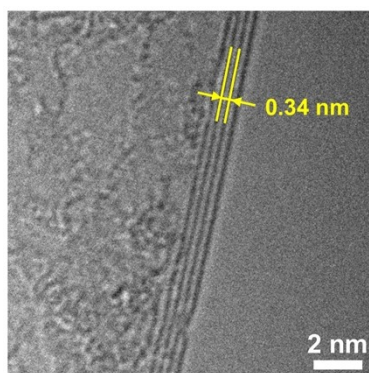

**Figure S7.** HRTEM image of a folded edge of a few-layer h-BN sample transferred on a TEM grid.

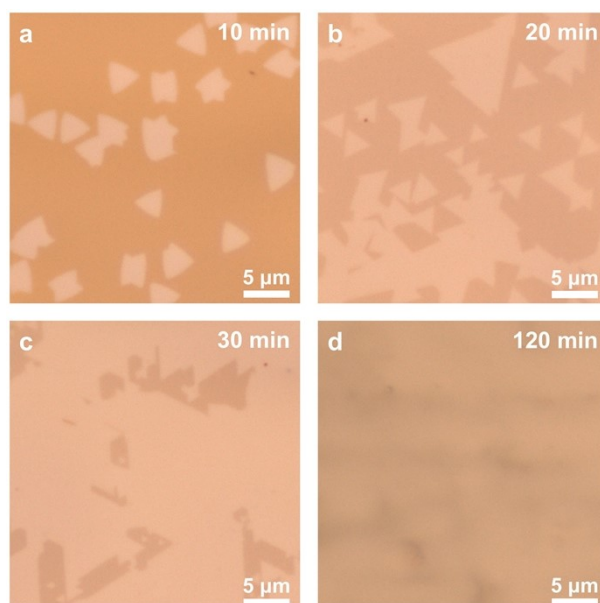

**Figure S8.** Optical images of monolayer h-BN samples grown by CVD for 10 min (a), 20 min (b), 30 min (c) and 120 min (d), respectively.

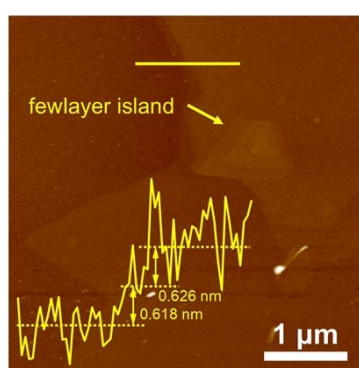

**Figure S9.** Few-layer h-BN samples can be obtained when using h-BN powders with partical size below 150 nm (99.9% purity, particle size <150 nm, Adamas).

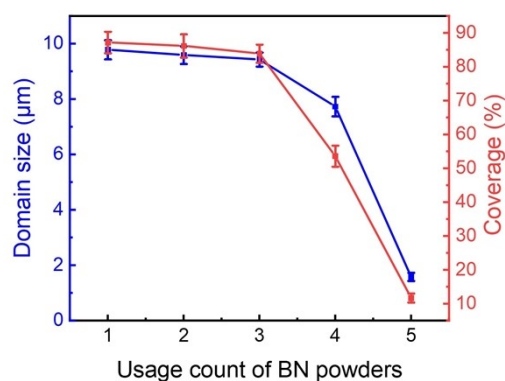

**Figure S10.** Domain size and coverage of monolayer h-BN samples grown on Cu substrates as a function of the usage count of the h-BN powders. Domain size and coverage of monolayer h-BN samples maintain the same level at the first three times, and decrease considerably starting from the fourth time, which means that the precursor, h-BN powder, can be used several times to growth 2D h-BN samples for further cost savings.

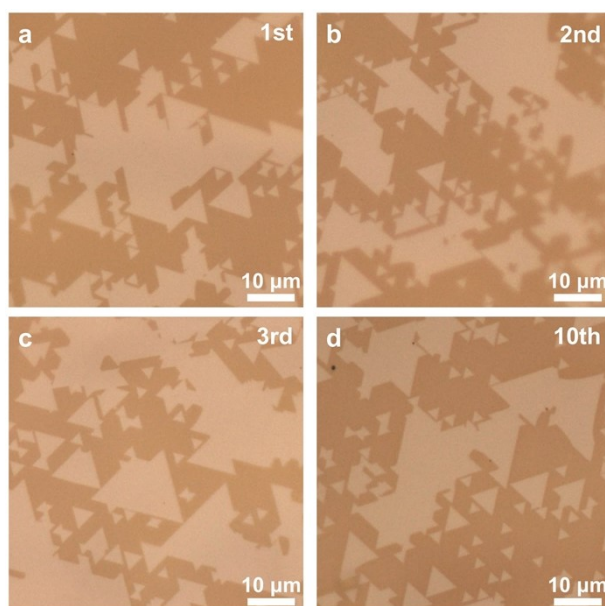

**Figure S11.** Optical images of monolayer h-BN samples grown on the same Cu substrate for 1st time (a), 2nd time (b), 3rd time (c) and 10th time (d).

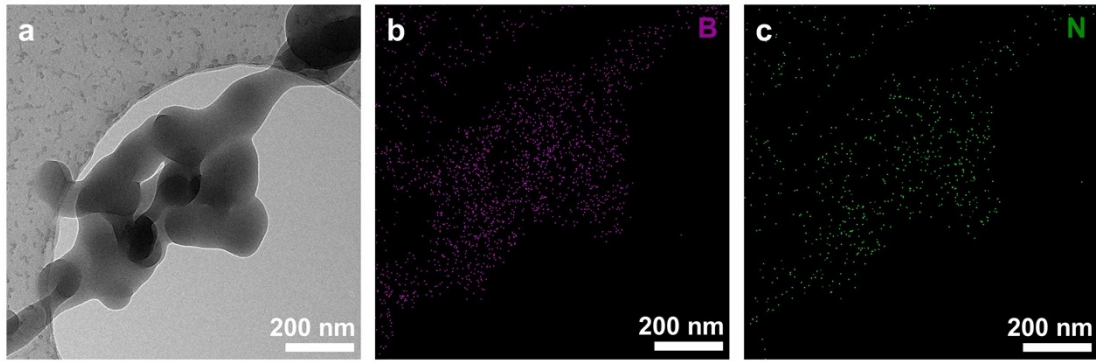

**Figure S12.** Low-magnification TEM image (a) of part of a free-standing 3D h-BN foam and its corresponding elemental mappings of B (b) and N (c).

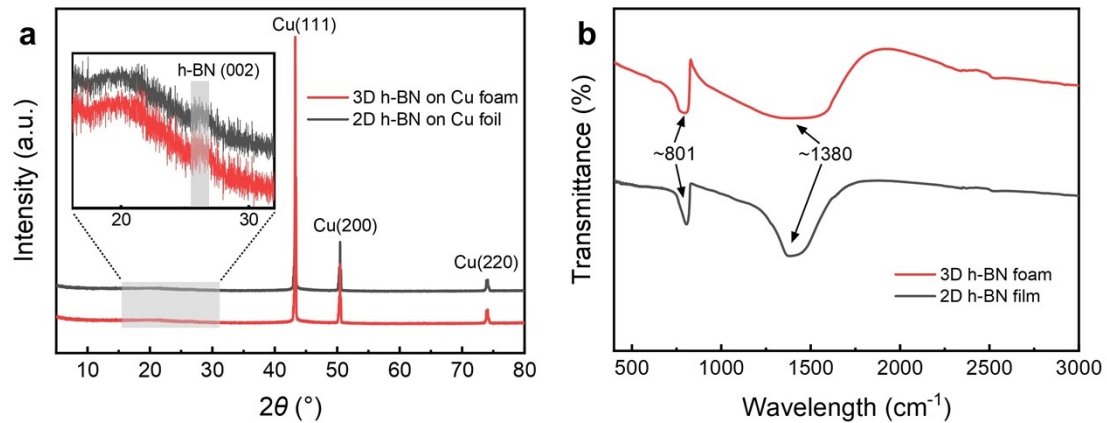

**Figure S13** a) XRD patterns of 2D h-BN and 3D h-BN samples grown on Cu foil and Cu foam, respectively. The inset shows the weak (002) peak of h-BN. The XRD patterns of h-BN and copper refer to PDF card #01-073-2095 and #00-004-0836, respectively. b) FTIR spectra of 2D h-BN film and 3D h-BN foam.

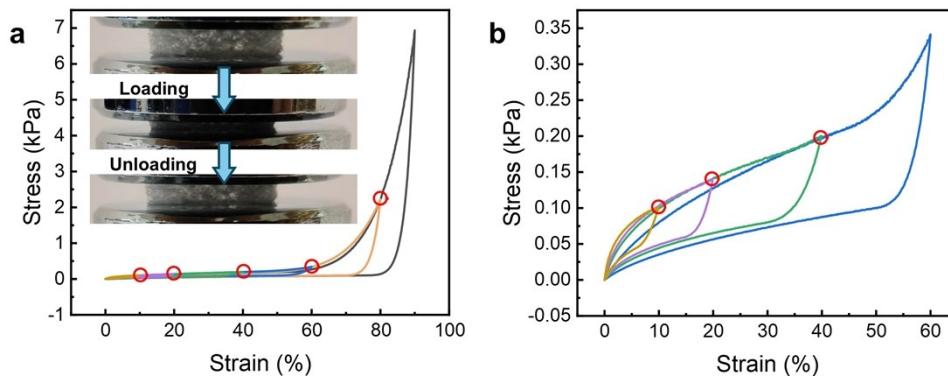

**Figure S14.** a) Stress-strain curves of BNF@PDMS composites during loading-unloading cycles in sequence of increasing strain amplitudes from 10% to 90%. The

inset shows the photographs of BNF@PDMS-21 undergoing a loading-unloading cycle. b) Enlarged curves of (a) from 10% to 80% strain amplitude.

Table S1. FWHM of 2D h-BN obtained with different synthesis methods.

| Synthesis methods        | Number of layers/Thickness | FWHM (cm <sup>-1</sup> ) | Reference |
|--------------------------|----------------------------|--------------------------|-----------|
| Mechanical Exfoliation   | 1L                         | 13.6                     | [1]       |
| Liquid-Phase Exfoliation | 2-3L                       | >20                      | [2]       |
|                          | few layers                 | 25.4                     | [3]       |
|                          | 1L                         | 14.5                     | [4]       |
| Traditional CVD          | 1L, 2L, few layers         | 15.6, 18.8, 26.1         | [5]       |
|                          | few layers                 | 24.5                     | [6]       |
| MOCVD                    | few layers                 | 18-24                    | [7]       |
| Green CVD                | 1L                         | 16.2                     | This work |

Table S2. The list of different densities of BNF@PDMS composites obtained by using different PDMS concentrations.

| Foam     | wt% of PDMS | $\rho$ (mg/cm <sup>3</sup> ) | Designation |
|----------|-------------|------------------------------|-------------|
| BNF      | 0           | 0.90 ± 0.05                  | BNF         |
| BNF@PDMS | 4           | 21.31 ± 1.74                 | BNF@PDMS-21 |
| BNF@PDMS | 6           | 34.54 ± 2.91                 | BNF@PDMS-35 |
| BNF@PDMS | 8           | 46.01 ± 3.03                 | BNF@PDMS-46 |

## References

[1] Zeng, F.; Wang, R.; Wei, W.; Feng, Z.; Guo, Q.; Ren, Y.; Cui, G.; Zou, D.; Zhang, Z.; Liu, S.; et al. Stamped Production of Single-crystal Hexagonal Boron Nitride Monolayers on Various Insulating Substrates. *Nat. Commun.* **2023**, *14* (1), 6421. <https://doi.org/10.1038/s41467-023-42270-x>.

- [2] Gonzalez Ortiz, D.; Pochat-Bohatier, C.; Cambedouzou, J.; Bechelany, M.; Miele, P. Exfoliation of Hexagonal Boron Nitride (h-BN) in Liquid Phase by Ion Intercalation. *Nanomater.* **2018**, *8* (9), 716. <https://doi.org/10.3390/nano8090716>.
- [3] Zhang, Z.; Su, J.; Matias, A. S.; Gordon, M.; Liu, Y.-S.; Guo, J.; Song, C.; Dun, C.; Prendergast, D.; Somorjai, G. A.; Urban, J. J. Enhanced and Stabilized Hydrogen Production from Methanol by Ultrasmall Ni Nanoclusters Immobilized on Defect-rich h-BN Nanosheets. *Proc. Natl. Acad. Sci.* **2020**, *117* (47), 29442-29452. <https://doi.org/10.1073/pnas.2015897117>.
- [4] Chen, T. A.; Chuu, C. P.; Tseng, C. C.; Wen, C. K.; Wong, H. S. P.; Pan, S. Y.; Li, R. T.; Chao, T. A.; Chueh, W. C.; Zhang, Y. F.; et al. Wafer-Scale Single-crystal Hexagonal Boron Nitride Monolayers on Cu (111). *Nature* **2020**, *579* (7798), 219-+. <https://doi.org/10.1038/s41586-020-2009-2>.
- [5] Gao, Y.; Ren, W. C.; Ma, T.; Liu, Z. B.; Zhang, Y.; Liu, W. B.; Ma, L. P.; Ma, X. L.; Cheng, H. M. Repeated and Controlled Growth of Monolayer, Bilayer and Few-Layer Hexagonal Boron Nitride on Pt Foils. *ACS Nano* **2013**, *7* (6), 5199-5206. <https://doi.org/10.1021/nn4009356>.
- [6] Bansal, A.; Hulse, M.; Huet, B.; Wang, K.; Kozhakhmetov, A.; Kim, J. H.; Bachu, S.; Alem, N.; Collazo, R.; Robinson, J. A.; et al. Substrate Modification during Chemical Vapor Deposition of hBN on Sapphire. *ACS Appl. Mater. Interfaces* **2021**, *13* (45), 54516-54526. <https://doi.org/10.1021/acscami.1c14591>.
- [7] Jeong, H.; Kim, D. Y.; Kim, J.; Moon, S.; Han, N.; Lee, S. H.; Okello, O. F. N.; Song, K.; Choi, S.-Y.; Kim, J. K. Wafer-scale and Selective-area Growth of High-quality Hexagonal Boron Nitride on Ni(111) by Metal-organic Chemical Vapor Deposition. *Sci. Rep.* **2019**, *9* (1), 5736. <https://doi.org/10.1038/s41598-019-42236-4>.
